# Supplementary material for: Validated single-tube multiparameter flow cytometry approach for the assessment of minimal residual disease in multiple myeloma
Source: PubMed Central journal article supplement — Haematologica. 2020 Apr 2;105(10):e523–30. doi: 10.3324/haematol.2019.238394 (PMC7556664; doi:10.3324/haematol.2019.238394), 2020-04-02
Supplement: 2019.238394.DOLD_SUPPL.pdf [file 2019.238394.DOLD_SUPPL.pdf]

**Validated single-tube multiparameter flow cytometry approach for the assessment of minimal residual disease in multiple myeloma**

*Sandra Maria Dold,<sup>1,2</sup> Veronika Riebl,<sup>1</sup> Dagmar Wider,<sup>1</sup> Marie Follo,<sup>1</sup> Milena Pantic,<sup>1</sup> Gabriele Ihorst,<sup>3</sup> Justus Duyster,<sup>1,4</sup> Robert Zeiser,<sup>1,4</sup> Ralph Wäsch<sup>1,4</sup> and Monika Engelhardt<sup>1,4</sup>*

<sup>1</sup>Department of Medicine I Hematology and Oncology, Medical Center, Faculty of Medicine; <sup>2</sup>Faculty of Biology; <sup>3</sup>Clinical Trials Unit, Medical Center, Faculty of Medicine and <sup>4</sup>Comprehensive Cancer Center Freiburg (CCCF), Medical Center, Faculty of Medicine, University of Freiburg, Freiburg, Germany

Correspondence: MONIKA ENGELHARDT - [monika.engelhardt@uniklinik-freiburg.de](mailto:monika.engelhardt@uniklinik-freiburg.de)

doi:10.3324/haematol.2019.238394

## Supplements

### Methods

#### *Cell culture*

Nine human multiple myeloma cell lines (MMCLs), IM-9, OPM-2, NCI-H929, L363, Karpas620, U266B1, MM1.S, RPMI8226 and MM1.R (mycoplasma free and assessed for genetic differences from the originals by the DSMZ, Heidelberg in 03/2016) were kindly provided by Dr. Julia Schöler (Oncotest, Freiburg, Germany) in 08/2016. All MMCLs were cultured in RPMI 1640 medium (Gibco life technologies, Darmstadt, Germany) containing 10% (V/V) fetal calf serum (Sigma-Aldrich Chemie GmbH, München, Germany) and 1% (V/V) Penicillin-Streptomycin (10,000U/ml) (Gibco life technologies, Darmstadt, Germany). Cells were incubated at 37°C and 5% CO<sub>2</sub> (HeraCell 240i CO<sub>2</sub> Incubator, Thermo Fisher Scientific GmbH, Darmstadt, Germany). Cells were harvested at a confluency of 70-80%.

#### *Assay validation: the use of MM cell lines for the assessment of analytical specificity and stability (samples, sensitivity and antibody mix)*

MMCLs or human peripheral blood mononuclear cells (PBMCs) were processed with the described bulk lysis protocol and stained with the 6- or 8-color panel. To assess the impact of light exposure on the staining quality, RPMI8226 were stained with the 6-color panel and directly measured and after 15, 30, 45 and 60 minutes (min) of light exposure, while kept on ice. To assess the time-dependent stability of the antibody-mix, the 6-color mix was prepared on 5 following days and L363 cells were stained with all 5 mixes at day 5 and directly measured after staining. To assess the stability of the sample staining, L363 cells were stained with the 6- and 8- color panel and measured directly after staining and every 20min for a timeframe of 3 hours. In-between measurements cells were kept on ice and light-protected. For these validation experiments 50,000 events were acquired at every time point. To check for stability and precision over time 30,000 MMCLs cells were spiked into PBMCs, stained with both panels and measured directly after staining and every 40min for an interval of 200min. For this validation experiment  $3 \times 10^6$  events were acquired for every time point with conditions as described above.

The analytical sensitivity, precision and linearity were assessed as follows: NCI-H929 cells were spiked into human PBMCs of HIs in 5 linear, defined concentrations (0.0007%; 0.0033%; 0.0066%; 0.033%; 0.0666%) for the dilution assay. Cells were stained as described above and 3,000,000 events per cell concentration were acquired.

#### *Patient samples and characteristics*

Two-hundred-and-five bone marrow (BM) samples from 163 consecutive multiple myeloma (MM) patients (some were measured sequentially) undergoing routine BM aspiration at the University Medical Center Freiburg between 04/17–04/19, and samples of healthy individuals (HIs) were included. Samples of patients diagnosed with monoclonal gammopathy of undetermined

significance/smoldering multiple myeloma (MGUS/SMM) or MM were analyzed before treatment. MM patient samples were analyzed after 3 cycles of therapy or 1, 3, or 12 months post stem cell transplantation (SCT) for minimal residual disease (MRD) determination, depending on the routine time point of BM evaluation. Samples were analyzed directly after aspiration or whole BM was stored at 4°C and analyzed within 24 hours (h). Seventy-four samples at initial diagnosis (ID) (25 MGUS/SMM and 49 MM), 30 at progressive disease (PD) and 101 post treatment were measured. A total of 13 BM samples of HIs were included as controls.

Cytogenetic aberrations were detected in CD138 positive cells of the total BM using Fluorescence *in-situ* hybridization (FISH).

The analyses were carried out according to the Declaration of Helsinki and good clinical practice. This study was approved by the ethics committee of the University of Freiburg (No. 212/16). All patients gave written informed consent for the use of their samples for research purposes.

#### *Sample processing, data acquisition and data analysis*

BM samples were filtered and incubated with 1xNH<sub>4</sub>Cl lysis solution for 15min on the shaker for erythrocyte lysis. After washing, cells were incubated with an anti-human FcR-Block (Thermo Fisher Scientific GmbH, Darmstadt, Germany) and directly stained with the cell-surface antibodies CD138APC, CD38PE-Cy7, CD45APC-H7, CD56PerCp-Cy5.5, CD27PE, CD19BV510 (Suppl. Table 1) included in both panels for 30min at 4°C in the dark. After washing, the 6-color samples were directly measured using a BD LSRFortessa (Becton Dickinson Biosciences, Heidelberg, Germany), which was daily validated with BD CS&T beads. Compensation was renewed every 4 months. The 8-color samples were additionally stained with the intracellular antibodies kappa-FITC and lambda-AF405 (Suppl. Table 1) using the Fix&Perm Kit (Thermo Fisher Scientific GmbH, Darmstadt, Germany) according to the manufacturer's instructions, washed once and measured directly. For all analyses, 3x10<sup>6</sup> events were acquired. Unstained cells were used as controls. Samples were analyzed using Kaluza V2.1 (Beckman Coulter).

#### *Statistical analyses*

Data was analyzed using the paired t-test for pre-post comparisons and unpaired t-test for group comparisons, using t-tests with the assumption of normal distribution and the Mann-Whitney-U-test for patient samples with the assumption of no normal distribution. Progression-free and overall survival (PFS/OS) were calculated as time from BM aspiration until first progression (PFS) or death of any cause (PFS/OS). Patients without any event of interest were considered as censored observation at the time last seen alive without disease progression or death of any cause. PFS and OS were estimated using Kaplan-Meier method and compared using log-rank test. Statistical significance was defined as P<0.05. Statistical analyses were performed using GraphPadPrism V5.03 and SAS V9.2.

## Supplemental References

1. Sonneveld P, Avet-Loiseau H, Lonial S, et al. Treatment of multiple myeloma with high-risk cytogenetics: a consensus of the International Myeloma Working Group. *Blood* 2016;127(24):2955–2962.
2. Bergsagel PL, Mateos M-V, Gutierrez NC, Rajkumar SV, Miguel JFS. Improving overall survival and overcoming adverse prognosis in the treatment of cytogenetically high-risk multiple myeloma. *Blood* 2013;121(6):884–892.
3. Rajkumar SV. Multiple myeloma: 2012 update on diagnosis, risk-stratification, and management. *Am J Hematol* 2012;87(1):78–88.
4. Descamps G, Pellat-Deceunynck C, Szpak Y, Bataille R, Robillard N, Amiot M. The Magnitude of Akt/Phosphatidylinositol 3'-Kinase Proliferating Signaling Is Related to CD45 Expression in Human Myeloma Cells. *J Immunol* 2004;173(8):4953–4959.
5. Duperray C, Klein B, Durie BG, et al. Phenotypic analysis of human myeloma cell lines. *Blood* 1989;73(2):566–572.
6. Maïga S, Brosseau C, Descamps G, et al. A simple flow cytometry-based barcode for routine authentication of multiple myeloma and mantle cell lymphoma cell lines. *Cytometry A* 2015;87(4):285–288.
7. Pellat-Deceunynck C, Bataille R, Robillard N, et al. Expression of CD28 and CD40 in human myeloma cells: a comparative study with normal plasma cells. *Blood* 1994;84(8):2597–2603.
8. Pellat-Deceunynck C, Amiot M, Bataille R, et al. Human myeloma cell lines as a tool for studying the biology of multiple myeloma: a reappraisal 18 years after [letter]. *Blood* 1995;86(10):4001–4002.
9. Tai Y-T, Dillon M, Song W, et al. Anti-CS1 humanized monoclonal antibody HuLuc63 inhibits myeloma cell adhesion and induces antibody-dependent cellular cytotoxicity in the bone marrow milieu. *Blood* 2008;112(4):1329–1337.
10. Kuranda K, Berthon C, Dupont C, et al. A subpopulation of malignant CD34+CD138+B7-H1+ plasma cells is present in multiple myeloma patients. *Exp Hematol* 2010;38(2):124–131.e4.
11. Païno T, Sarasquete ME, Paiva B, et al. Phenotypic, Genomic and Functional Characterization Reveals No Differences between CD138++ and CD138low Subpopulations in Multiple Myeloma Cell Lines. *PLOS ONE* 2014;9(3):e92378.
12. Drexler HG. DSMZ: Catalogue Human and Animal Cell Lines. <https://www.dsmz.de/catalogues/catalogue-human-and-animal-cell-lines.html> (2010, accessed May 9, 2019).
13. Karpas A, Harder L, Czepulkowski B, et al. Studies of four new human myeloma cell lines. *Leuk Lymphoma* 2005;46(1):101–112.
14. Baughn LB, Sachs Z, Noble-Orcutt KE, Mitra A, Ness BGV, Linden MA. Phenotypic and functional characterization of a bortezomib-resistant multiple myeloma cell line by flow and mass cytometry. *Leuk Lymphoma* 2016;0(0):1–10.
15. Ishikawa H, Mahmoud MS, Fujii R, Abroun S, Kawano MM. Proliferation of Immature Myeloma Cells by Interleukin-6 Is Associated with CD45 Expression in Human Multiple Myeloma. *Leuk Lymphoma* 2000;39(1–2):51–55.

16. Park J, Bae E-K, Lee C, et al. Establishment and characterization of bortezomib-resistant U266 cell line: Constitutive activation of NF- $\kappa$ B-mediated cell signals and/or alterations of ubiquitylation-related genes reduce bortezomib-induced apoptosis. *BMB Rep* 2014;47(5):274–279.
17. Greenstein S, Krett NL, Kurosawa Y, et al. Characterization of the MM.1 human multiple myeloma (MM) cell lines: A model system to elucidate the characteristics, behavior, and signaling of steroid-sensitive and -resistant MM cells. *Exp Hematol* 2003;31(4):271–282.

**Supplemental Table 1. Antibodies used for the 6- and 8-color panel.**

| <b>Antigen/Fluorochrome</b>        | <b>Isotype/Clone</b>                  | <b>Manufacturer</b>                         |
|------------------------------------|---------------------------------------|---------------------------------------------|
| <b>CD138 APC anti-human</b>        | IgG1 κ mouse/MI15                     | BioLegend GmbH, Fell                        |
| <b>CD19 BV510 anti-human</b>       | IgG1 κ mouse/SJ25C1                   | Becton Dickinson Biosciences, Heidelberg    |
| <b>CD27 PE anti-human</b>          | IgG1 κ mouse/1A4CD27                  | Beckman Coulter GmbH, Krefeld               |
| <b>CD38 PE-Cy7 anti-human</b>      | IgG1 κ mouse/HB7                      | BioLegend GmbH, Fell                        |
| <b>CD45 APC-H7 anti-human</b>      | IgG1 κ mouse/2D1                      | BioLegend GmbH, Fell                        |
| <b>CD56 PerCP-Cy5.5 anti-human</b> | IgG1 κ mouse/B159                     | Becton Dickinson Biosciences, Heidelberg    |
| <b>Kappa FITC anti-human</b>       | Rabbit/polyclonal F(ab') <sub>2</sub> | Agilent Technologies, Inc, Santa Clara, USA |
| <b>Lambda AF405 anti-human</b>     | IgG1 κ mouse/1-155-22                 | Novus Biologicals, Littleton, Colorado, USA |

**Supplemental Table 2. Expression of antigens in myeloma cell lines using the 6-color panel compared to published literature results. For all 9 MMCLs triplicates were assessed.**

| L363    |                          |                         | NCI-H929                 |                          | RPMI8226                 |                          |
|---------|--------------------------|-------------------------|--------------------------|--------------------------|--------------------------|--------------------------|
| Antigen | Mean % of positive cells | Literature<br>Ref.: 4–9 | Mean % of positive cells | Literature<br>Ref.: 5–11 | Mean % of positive cells | Literature<br>Ref.: 5–11 |
| CD19    | 0.1                      | -                       | 0.2                      | - (80%)                  | 0.2                      | - (80%)                  |
| CD27    | 1.1                      | -                       | 1.0                      | -                        | 1.0                      | -                        |
| CD45    | 0.0                      | +/-                     | 1.8                      | -                        | 1.8                      | -                        |
| CD56    | 31.9                     | +                       | 13.6                     | + (25%)                  | 13.6                     | + (25%)                  |
| CD38    | 65.9                     | +                       | 99.5                     | + (100%)                 | 99.5                     | + (100%)                 |
| CD138   | 98.4                     | +                       | 87.3                     | +                        | 87.3                     | +                        |

  

| IM-9    |                          |                        | Karpas620                |                             | U266B1                   |                                    |
|---------|--------------------------|------------------------|--------------------------|-----------------------------|--------------------------|------------------------------------|
| Antigen | Mean % of positive cells | Literature<br>Ref.: 12 | Mean % of positive cells | Literature<br>Ref.: 6,12,13 | Mean % of positive cells | Literature<br>Ref.: 4,5,7–11,14–16 |
| CD19    | 84.4                     | +                      | 2.4                      | -                           | 0.0                      | - (100%)                           |
| CD27    | 0.1                      |                        | 4.6                      | -                           | 0.0                      | -                                  |
| CD45    | 98.8                     |                        | 1.7                      | -                           | 0.0                      | -/+                                |
| CD56    | 0.0                      |                        | 8.0                      | +                           | 14.8                     | +/-                                |
| CD38    | 10.3                     | -                      | 97.6                     | +/-                         | 96.1                     | (+)                                |
| CD138   | 89.1                     |                        | 95.7                     | +                           | 42.5                     | +                                  |

  

| MM1.S   |                          |                             | OPM-2                    |                           | MM1.R                    |                             |
|---------|--------------------------|-----------------------------|--------------------------|---------------------------|--------------------------|-----------------------------|
| Antigen | Mean % of positive cells | Literature<br>Ref.: 9,11,17 | Mean % of positive cells | Literature<br>Ref.: 6,8,9 | Mean % of positive cells | Literature<br>Ref.: 9,11,17 |
| CD19    | 0.1                      | - (99.8%)                   | 0.4                      | -                         | 0.4                      | - (99.8%)                   |
| CD27    | 0.0                      | -                           | 1.5                      | -                         | 1.5                      | -                           |
| CD45    | 0.2                      | - (99.7%)                   | 13.1                     | -                         | 0.4                      | - (99.7%)                   |
| CD56    | 0.7                      | +                           | 97.9                     |                           | 1.5                      | (+/-)                       |
| CD38    | 100.0                    | + (96.1%)                   | 98.2                     | +                         | 97.6                     | + (96.1%)                   |
| CD138   | 75.6                     | +                           | 88.6                     | +                         | 88.9                     | +                           |

**Abbreviations:** CD: cluster of differentiation, MMCLs: Multiple Myeloma cell lines.

**Supplemental Table 3. Patient characteristics of MRD samples measured with 6- or 8-color panels: entire and 6/8-color patient description.**

|                                              | Total cohort (n=91) <sup>c</sup> |                | 6-color (n=54)  |                | 8-color (n=40)   |                |
|----------------------------------------------|----------------------------------|----------------|-----------------|----------------|------------------|----------------|
|                                              | No. (%)                          | Median (range) | No. (%)         | Median (range) | No. (%)          | Median (range) |
| <b>Stage</b>                                 |                                  |                |                 |                |                  |                |
| post CTx                                     | 10 (11)                          |                | 3 (6)           |                | 7 (18)           |                |
| post ASCT/alloSCT                            | 81 (89)                          |                | 51 (94)         |                | 33 (82)          |                |
| <b>Sex</b>                                   |                                  |                |                 |                |                  |                |
| Female                                       | 41 (45)                          |                | 22 (41)         |                | 20 (50)          |                |
| Male                                         | 50 (55)                          |                | 32 (59)         |                | 20 (50)          |                |
| <b>Age (years)</b>                           |                                  |                |                 |                |                  |                |
| ID                                           |                                  | 59 (28-84)     |                 | 57 (28-74)     |                  | 60 (32-84)     |
| Sampling                                     |                                  | 62 (29-86)     |                 | 59 (29-74)     |                  | 65 (32-86)     |
| <b>Durie &amp; Salmon (ID)</b>               |                                  |                |                 |                |                  |                |
| I                                            | 10 (11)                          |                | 6 (11)          |                | 4 (10)           |                |
| II                                           | 24 (26)                          |                | 10 (19)         |                | 15 (38)          |                |
| III                                          | 57 (63)                          |                | 38 (70)         |                | 21 (52)          |                |
| A/B                                          | 82 (90) / 9 (10)                 |                | 50 (93) / 4 (7) |                | 34 (85) / 6 (15) |                |
| <b>ISS (ID)</b>                              |                                  |                |                 |                |                  |                |
| I                                            | 35 (38)                          |                | 23 (43)         |                | 12 (30)          |                |
| II                                           | 28 (31)                          |                | 17 (31)         |                | 12 (30)          |                |
| III                                          | 28 (31)                          |                | 14 (26)         |                | 16 (40)          |                |
| <b>BM infiltration (%)</b>                   |                                  |                |                 |                |                  |                |
| Cytology                                     |                                  | 3 (0-28)       |                 | 3 (0-28)       |                  | 4 (0-20)       |
| Pathology                                    |                                  | 5 (0-40)       |                 | 5 (0-40)       |                  | 0 (0-40)       |
| <b>Cytogenetics<sup>a</sup></b>              |                                  |                |                 |                |                  |                |
| Unfavorable                                  | 3 (3)                            |                | 0 (0)           |                | 3 (8)            |                |
| Favorable                                    | 8 (9)                            |                | 3 (6)           |                | 5 (12)           |                |
| Normal Karyotype                             | 42 (46)                          |                | 24 (44)         |                | 20 (50)          |                |
| Missing                                      | 38 (42)                          |                | 27 (50)         |                | 12 (30)          |                |
| <b>MM type</b>                               |                                  |                |                 |                |                  |                |
| IgG                                          | 70 (77)                          |                | 43 (79)         |                | 29 (73)          |                |
| IgA                                          | 9 (10)                           |                | 3 (6)           |                | 6 (15)           |                |
| Light chain only                             | 12 (13)                          |                | 8 (15)          |                | 5 (12)           |                |
| <b>Light chain</b>                           |                                  |                |                 |                |                  |                |
| Kappa                                        | 67 (74)                          |                | 43 (80)         |                | 27 (68)          |                |
| Lambda                                       | 24 (26)                          |                | 11 (20)         |                | 13 (32)          |                |
| <b>Last therapy before MRD determination</b> |                                  |                |                 |                |                  |                |
| PIs                                          | 70 (77)                          |                | 42 (78)         |                | 29 (73)          |                |
| IMiDs                                        | 6 (7)                            |                | 4 (8)           |                | 2 (4)            |                |
| Antibodies                                   | 14 (15)                          |                | 6 (12)          |                | 9 (23)           |                |
| Others                                       | 1 (1)                            |                | 1 (2)           |                | 0 (0)            |                |
| <b>Remission<sup>b</sup></b>                 |                                  |                |                 |                |                  |                |
| CR                                           | 18 (20)                          |                | 6 (11)          |                | 14 (35)          |                |
| vgPR                                         | 52 (57)                          |                | 42 (78)         |                | 12 (30)          |                |
| PR                                           | 18 (20)                          |                | 5 (9)           |                | 12 (30)          |                |
| SD                                           | 3 (3)                            |                | 1 (2)           |                | 2 (5)            |                |
| <b>MM Progression</b>                        |                                  |                |                 |                |                  |                |
| Yes                                          | 15 (16)                          |                | 12 (22)         |                | 3 (8)            |                |
| No                                           | 76 (84)                          |                | 42 (78)         |                | 37 (92)          |                |
| <b>Vital status</b>                          |                                  |                |                 |                |                  |                |
| Dead                                         | 1 (1)                            |                | 1 (2)           |                | 0 (0)            |                |
| Alive                                        | 90 (99)                          |                | 53 (98)         |                | 40 (100)         |                |

**Abbreviations:** BM: bone marrow, CR: complete remission, del: deletion, ID: initial diagnosis, IMiDs: Immunomodulatory drugs, IMWG: International Myeloma Working Group, MM: multiple myeloma, no.: number, PIs: Proteasome Inhibitors, post alloSCT: post allogeneic stem cell transplantation, post ASCT: post autologous stem cell transplantation, post CTx: post chemotherapy, PR: partial remission, SD: stable disease, vgPR: very good partial remission.

<sup>a</sup> unfavorable defined as: +1q, t(4;14), t(14;16), del1p, cMYC, del17p; standard-risk defined as: Hyperdiploidy, t(11;14), del13q, Monosomy 13, del14q (IGH).

<sup>b</sup> according to IMWG criteria.

<sup>c</sup> some patients were measured more than ones during period of sampling. Every patient was only counted ones for each cohort. The number of both cohorts together was higher than of the entire cohort, because some patients were measured sequentially.

## Supplemental Figure legends

### Supplemental Figure 1. Comparison of our method with the EuroFlow standardized MRD assay and the MSKCC panel.

**A.** The two assays were compared side-by-side for the features regarding the assay (dark grey), the data (blue), the equipment needed (green), the costs (red) and the analyzed patient cohort (light grey).

**B.** The three assays were compared for the features regarding the markers, costs, sensitivity, number of needed cells and tube numbers.

h: hours.

### Supplemental Figure 2. Gating strategy for the 6- and 8-color panel.

**A.** With the 6-color panel PCs were identified with the CD138/CD38 gate and further analyzed for their CD19/CD45 expression. In these 4 populations, expression of CD56/CD27 was analyzed and aPCs (red circle) could be distinguished from nPCs (green circle).

**B.** The gating strategy was based on the gating strategy of the 6-color panel. After analyzes of CD56/CD27 expression, populations were analyzed for their expression of intracellular kappa and lambda. Populations with an aberrant extracellular phenotype and monoclonal expression of either kappa or lambda were defined as aPCs. Populations with a normal extracellular phenotype were and polyclonal expression of kappa and lambda were defined as nPCs.

aPCs: aberrant plasma cells, CD: Cluster of differentiation, nPCs: normal plasma cells.

### Supplemental Figure 3. Assay validation: stability of samples, assay precision and antibody mix

**A-B.** A MMCL was stained with the 6- (A) or 8- (B) color antibody panel to analyze the stability of the staining, lasers and machine over time. After staining, the cells were measured directly, and every 20min for a total time period of 3h. No significant differences in the expression levels of CD19, CD27, CD45, CD38 and CD138 could be observed. The expression level of CD56 significantly decreases after 40min (\*  $p=0.0462$ ) in the 6- and in the 8-color panel after 20min (\*\*  $p=0.0092$ ).

**C-D.** MMCL cells were spiked into human PBMCs of a healthy individual and stained with the 6- (C) or 8- (D) color panel to examine stability of sensitivity and precision of staining over time. After staining, the cells were directly measured and every 40min for a total time period of 200min. No significant differences in the number of cells and viability could be observed.

**E.** MMCL cells were stained with the antibodies included in both panels to check for the stability of fluorochromes during light exposure. After staining the cells were measured directly and after 15, 30, 45 and 60min of light exposure. No significant differences in the brightness of fluorochromes, expression levels or the viability of the cells could be observed.

**F.** An antibody mix of the 6-color panel was prepared every day on 5 following days to examine the stability of the antibody mix over time. MMCL cells were measured on day 5 with each mix prepared during the 5 days. No significant differences in the expression levels could be observed.

Graph depicted mean  $\pm$  SD, paired t-test.

CD: cluster of differentiations, min: minutes, MMCL: Multiple Myeloma Cell Line, n: number, PBMCs: peripheral blood mononuclear cells, SD: standard deviation.

### Supplemental Figure 4. Progression-free and overall survival of MRD- vs MRD+ samples and subgroup analyses.

**A.** MRD samples were divided into 4 groups according to MRD status and cytogenetic risk at ID. High-risk (HR) cytogenetics were defined as aberration +1q, t(4;14), t(14;16), del1p, cMYC, or del17p; standard-risk (SR) was defined as hyperdiploidy, t(11;14), del13q, Monosomy 13 or del14q (IGH).<sup>1-3</sup> The estimated median PFS for the MRD+/SR patients (n=40) was 17.9 months, the median PFS for the MRD+/HR (n=27) was 15.4 months, and for the MRD-/HR (n=6) and MRD-/SR (n=16) patients median PFS was not reached. There was a slight tendency towards a better PFS for the MRD-/SR compared to the MRD-/HR group. The MRD-/HR group had a better outcome than the MRD+/SR and MRD+/HR group. The hazard ratio (HR) (95% confidence interval (CI)) for

the three groups compared to the MRD-/SR group was 2.528 (0.16-41.35) (MRD-/HR), 2.069 (0.25-17.06) (MRD+/SR) and 3.805 (0.45-32.00) (MRD+/HR).

**B.** The OS was also determined for the MRD level in combination with the cytogenetics. No big difference could be observed due to only one event censored.

BM: Bone Marrow, CI: confidence interval; del: deletion, HR: Hazard ratio, HR: High-risk, ID: initial diagnosis, MRD: Minimal residual disease, n: number, n.r.: not reached, OS: overall survival, PFS: progression-free survival, SR: standard-risk, t: translocation.

A

FreiburgEuroFlow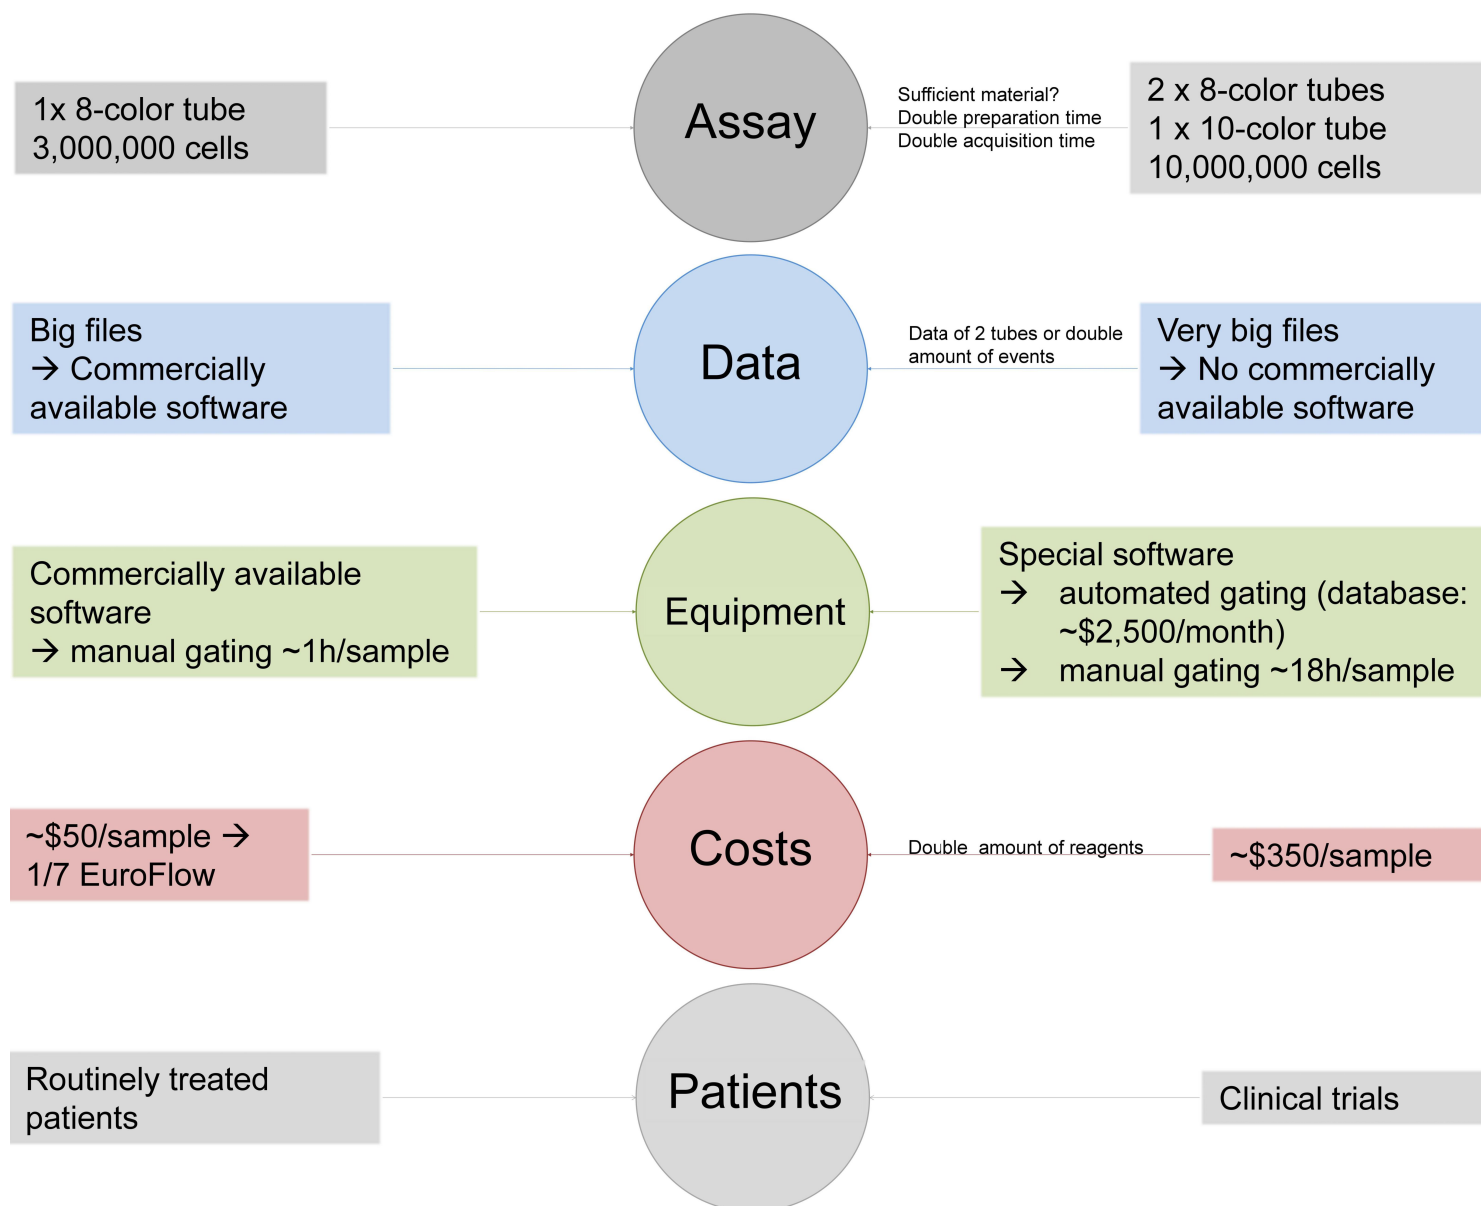

B

|                                       | <b>Freiburg</b>                           | <b>EuroFlow</b>                                        | <b>MSKCC</b>                                           |
|---------------------------------------|-------------------------------------------|--------------------------------------------------------|--------------------------------------------------------|
| <b>Markers</b>                        | CD38, CD56, CD138, CD19, CD27, CD45, κ, λ | CD38, CD56, CD138, CD19, CD27, CD45, CD117, CD81, κ, λ | CD38, CD56, CD138, CD19, CD27, CD45, CD117, CD81, κ, λ |
| <b># of markers being used</b>        | 8                                         | 10                                                     | 10                                                     |
| <b>Tubes</b>                          | 1                                         | 2                                                      | 1                                                      |
| <b>Number of cells being acquired</b> | 3,000,000                                 | 10,000,000                                             | 5,000,000                                              |
| <b>Costs</b>                          | ~\$50/sample                              | ~\$350/sample                                          | -                                                      |
| <b>Sensitivity</b>                    | 10 <sup>-5</sup>                          | 10 <sup>-5</sup> -10 <sup>-6</sup>                     | 10 <sup>-5</sup>                                       |

Suppl. Figure 1

## A Gating 6-color panel

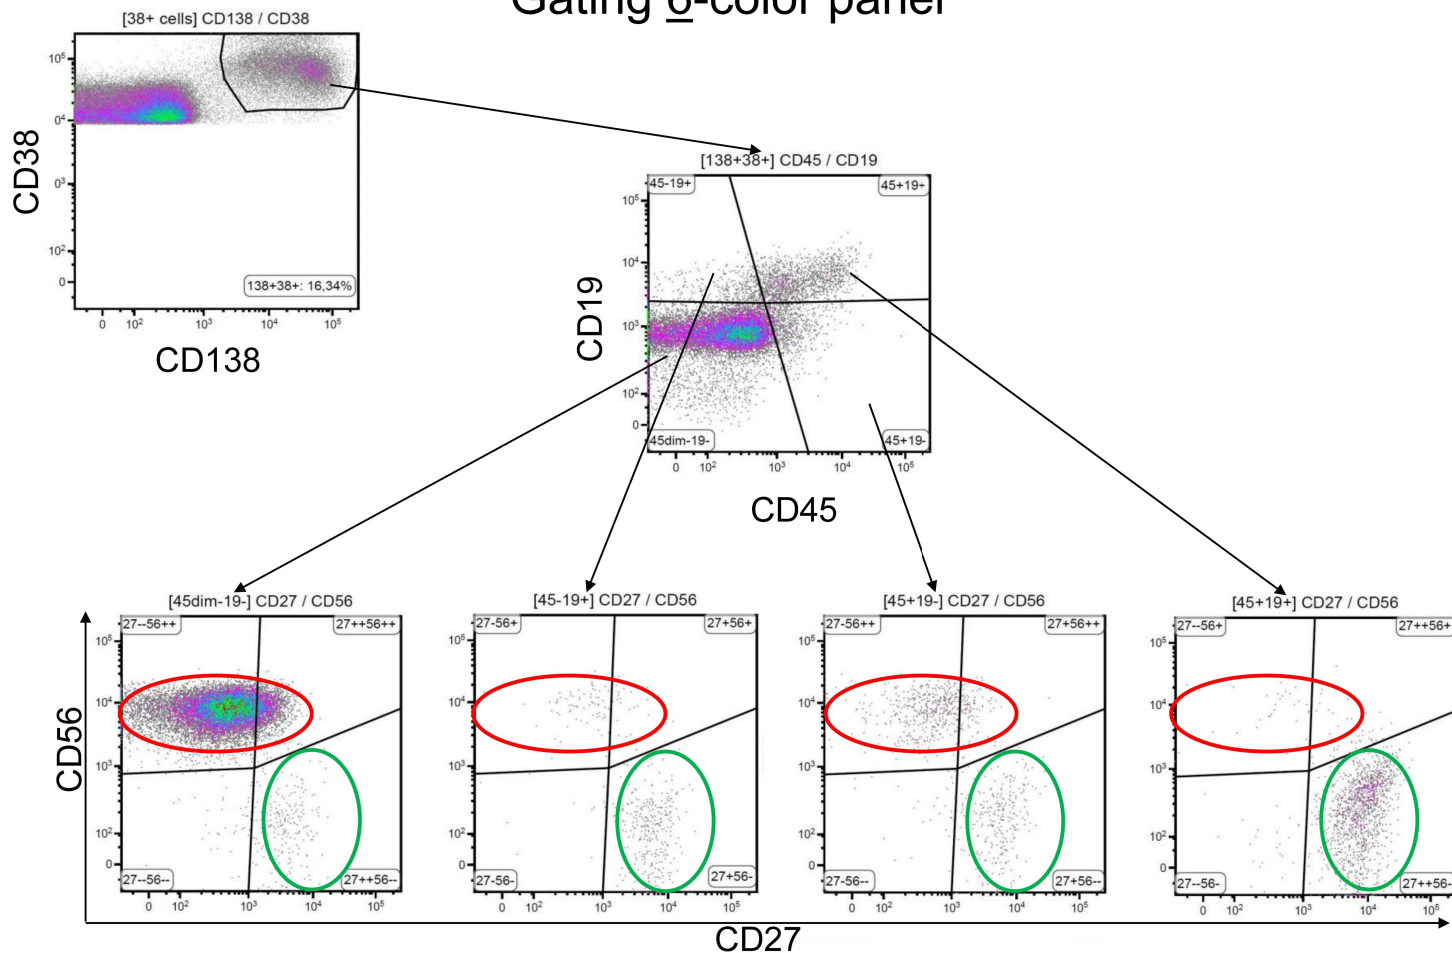

## B Gating 8-color panel

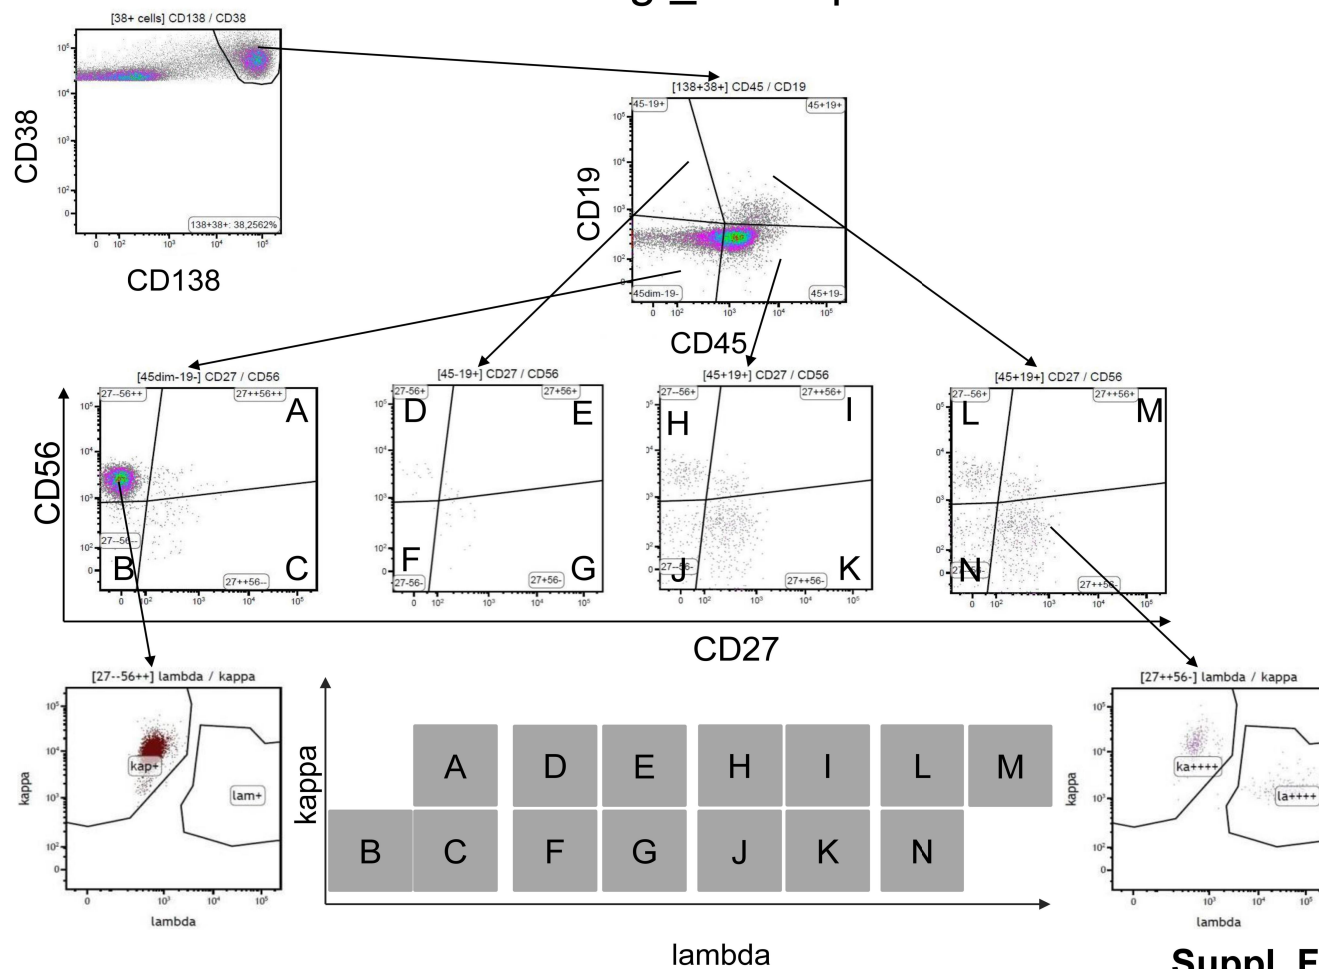

Suppl. Figure 2

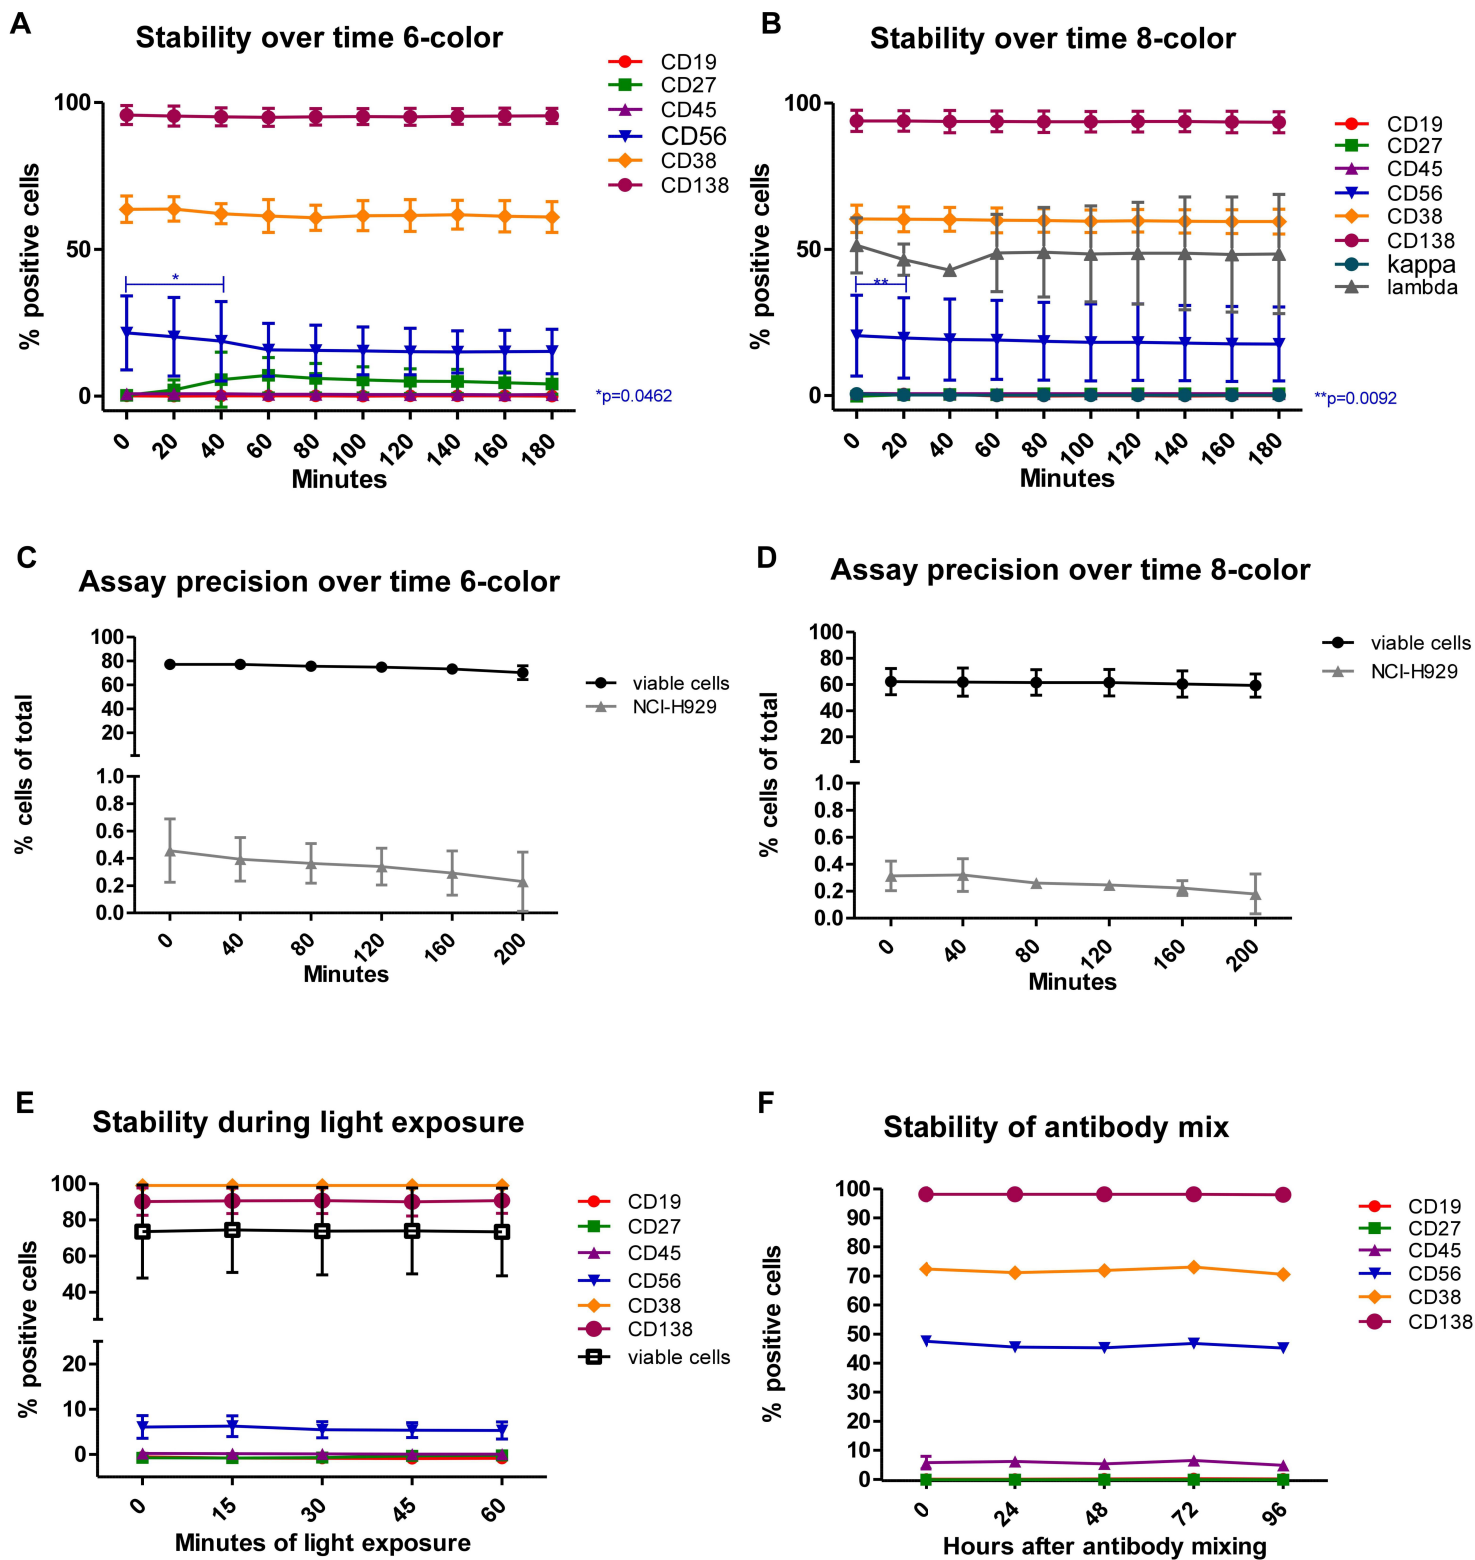

Suppl. Figure 3

**A**

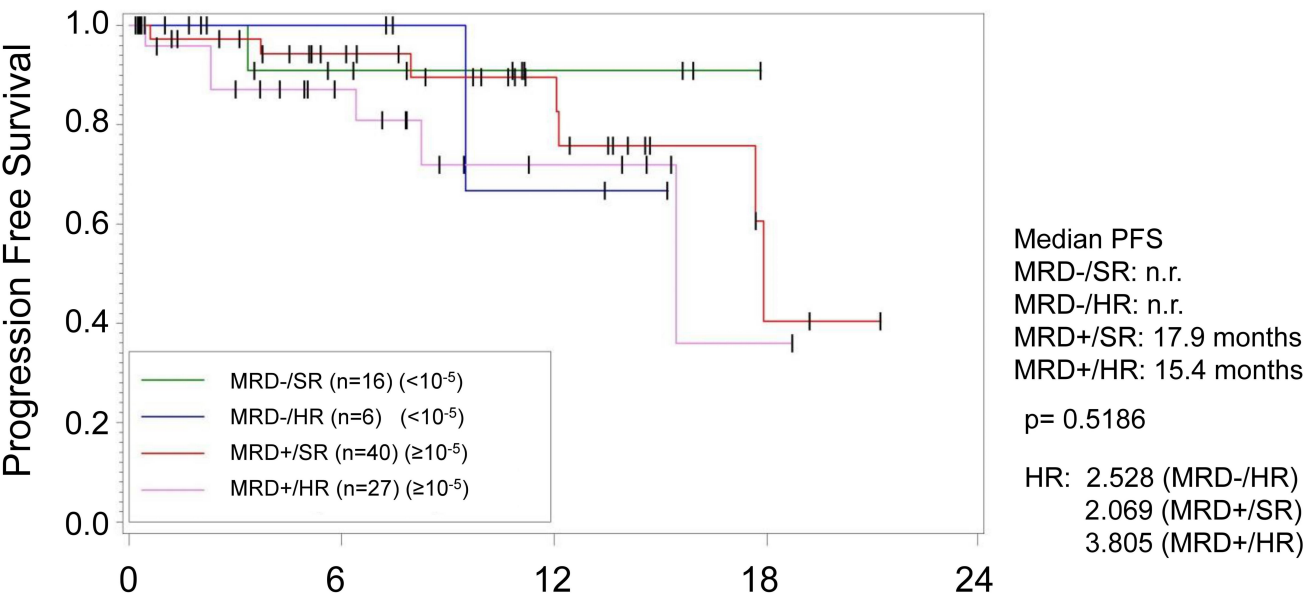

| Patients at risk (n) |    |    | Months after sample collection |   |   |
|----------------------|----|----|--------------------------------|---|---|
| MRD-/SR              | 16 | 8  | 3                              | 0 | 0 |
| MRD-/HR              | 6  | 5  | 2                              | 0 | 0 |
| MRD+/SR              | 40 | 24 | 13                             | 2 | 0 |
| MRD+/HR              | 27 | 14 | 5                              | 1 | 0 |

**B**

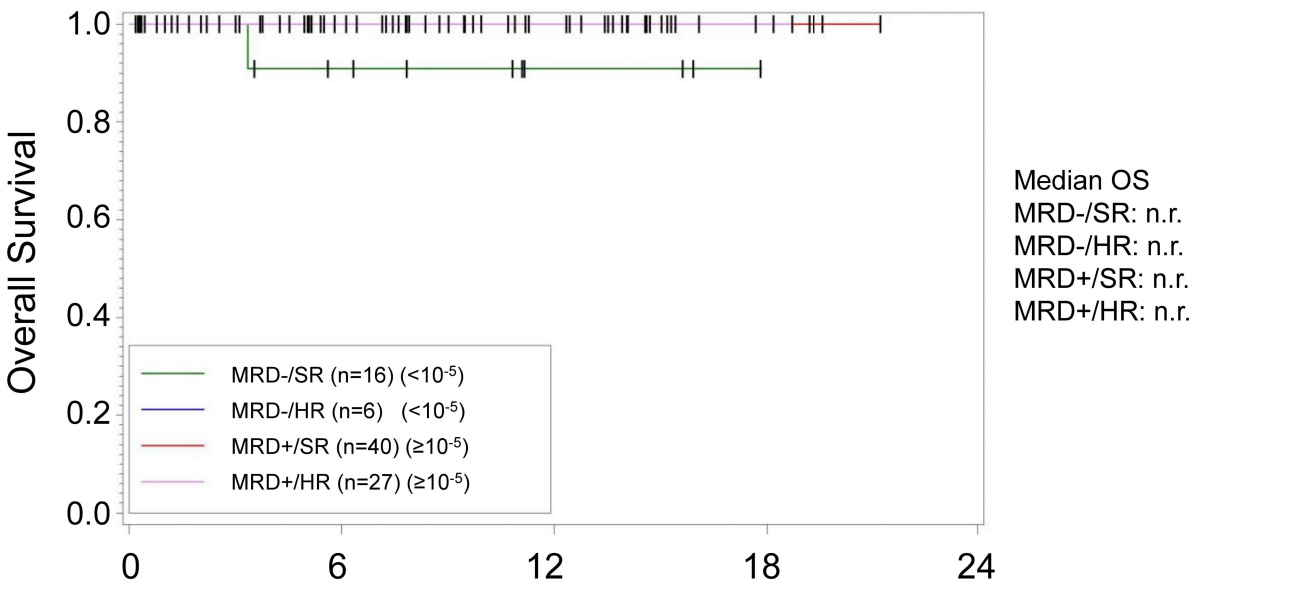

| Patients at risk (n) |    |    | Months after sample collection |   |   |
|----------------------|----|----|--------------------------------|---|---|
| MRD-/SR              | 16 | 8  | 3                              | 0 | 0 |
| MRD-/HR              | 6  | 5  | 3                              | 0 | 0 |
| MRD+/SR              | 40 | 25 | 15                             | 5 | 0 |
| MRD+/HR              | 27 | 17 | 7                              | 1 | 0 |

**Suppl. Figure 4**
